# Supplementary material for: Cancer-associated IDH1 mutations produce 2-hydroxyglutarate
Source: Springer Nature journal article supplement (doi:10.1038/nature08617), 2009-11-22
Supplement: 41586_2009_BFnature08617_MOESM270_ESM.pdf [file 41586_2009_BFnature08617_MOESM270_ESM.pdf]

## SUPPLEMENTARY INFORMATION

a.

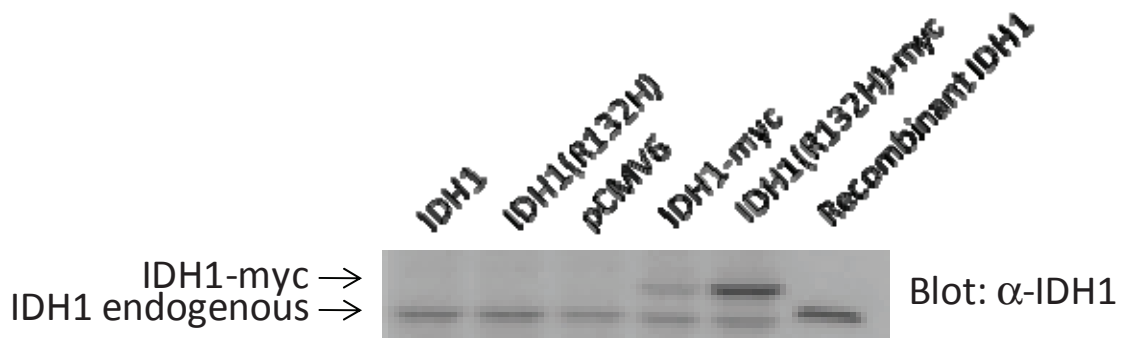

b.

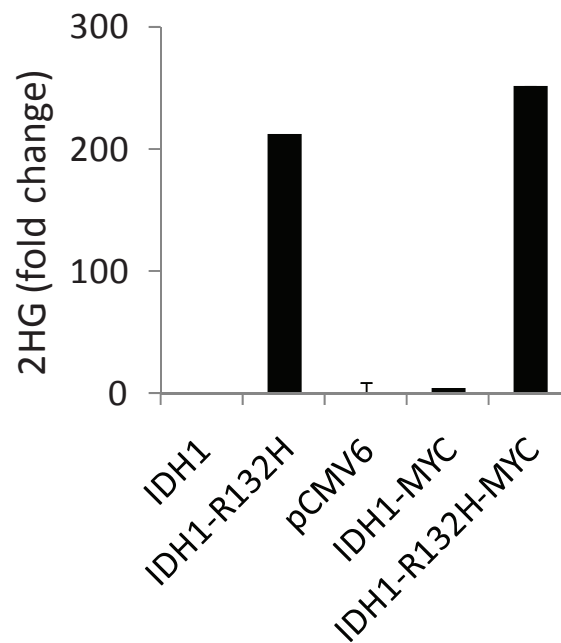

**Supplementary Figure 1. Untagged and Myc-tagged IDH1(R132H) produce similar levels of 2-**

**hydroxyglutarate. (a)** Myc-tagged and untagged IDH1 constructs were transiently expressed in 293T cells. A

Western blot to assess expression is shown. **(b)** 2HG levels in cell extracts were measured by LC-MS. Data

were normalized by cell number and expressed as fold increase in 2HG relative to 293T cells transfected with

vector alone. Error bars depict one s.d. from the mean of 3 independent experiments.

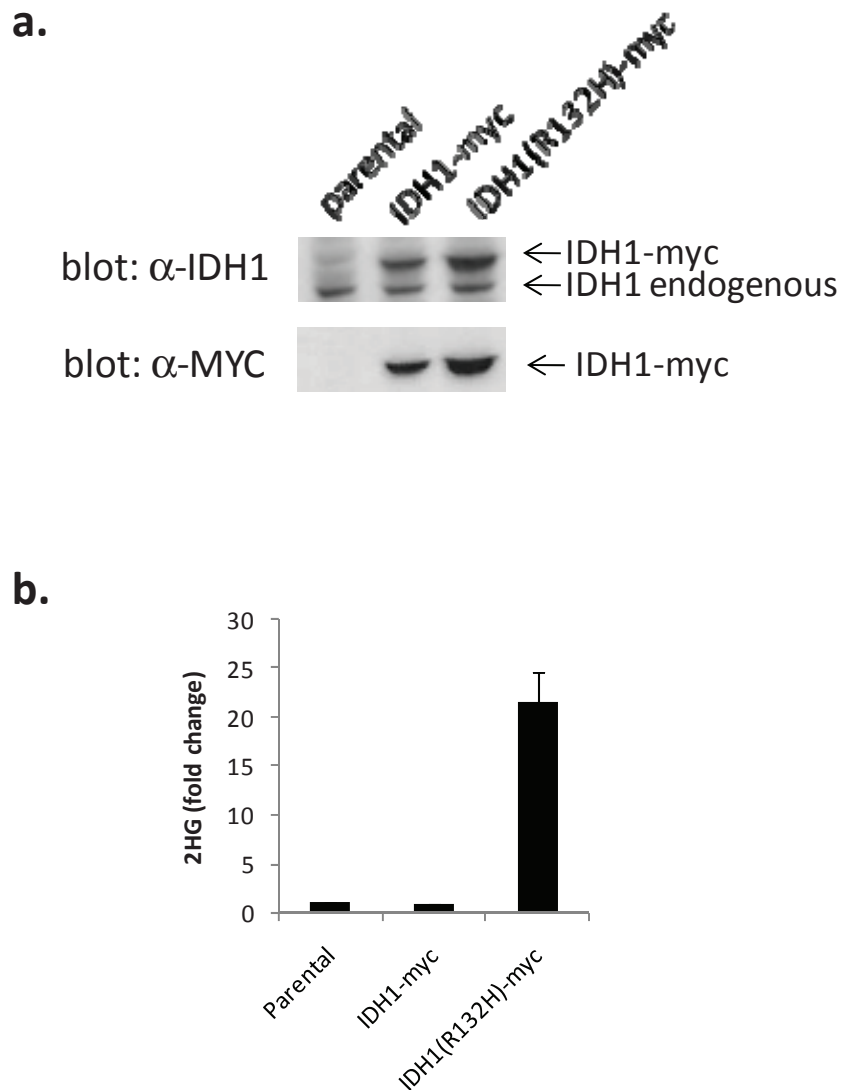

**Supplementary Figure 2. LN-18 cells expressing human R132H IDH1 also contain elevated levels of 2HG. (a)** Myc-tagged human isocitrate dehydrogenase 1 (IDH1-myc) or R132H mutant (R132H-myc) were transfected into LN-18 human glioblastoma cells. Expression was confirmed by Western blot of cell lysates using antibodies recognizing either human IDH1 or the carboxy-terminal Myc epitope tag. **(b)** Extracts from cells expressing R132H mutant IDH1 (IDH1 (R132H)-myc) contain elevated levels of 2HG compared with cells expressing wild-type IDH1 (IDH1-myc). Data were normalized by cell number and expressed as fold difference relative to parental values. Error bars depict one s.d. from the mean of 3 independent experiments.

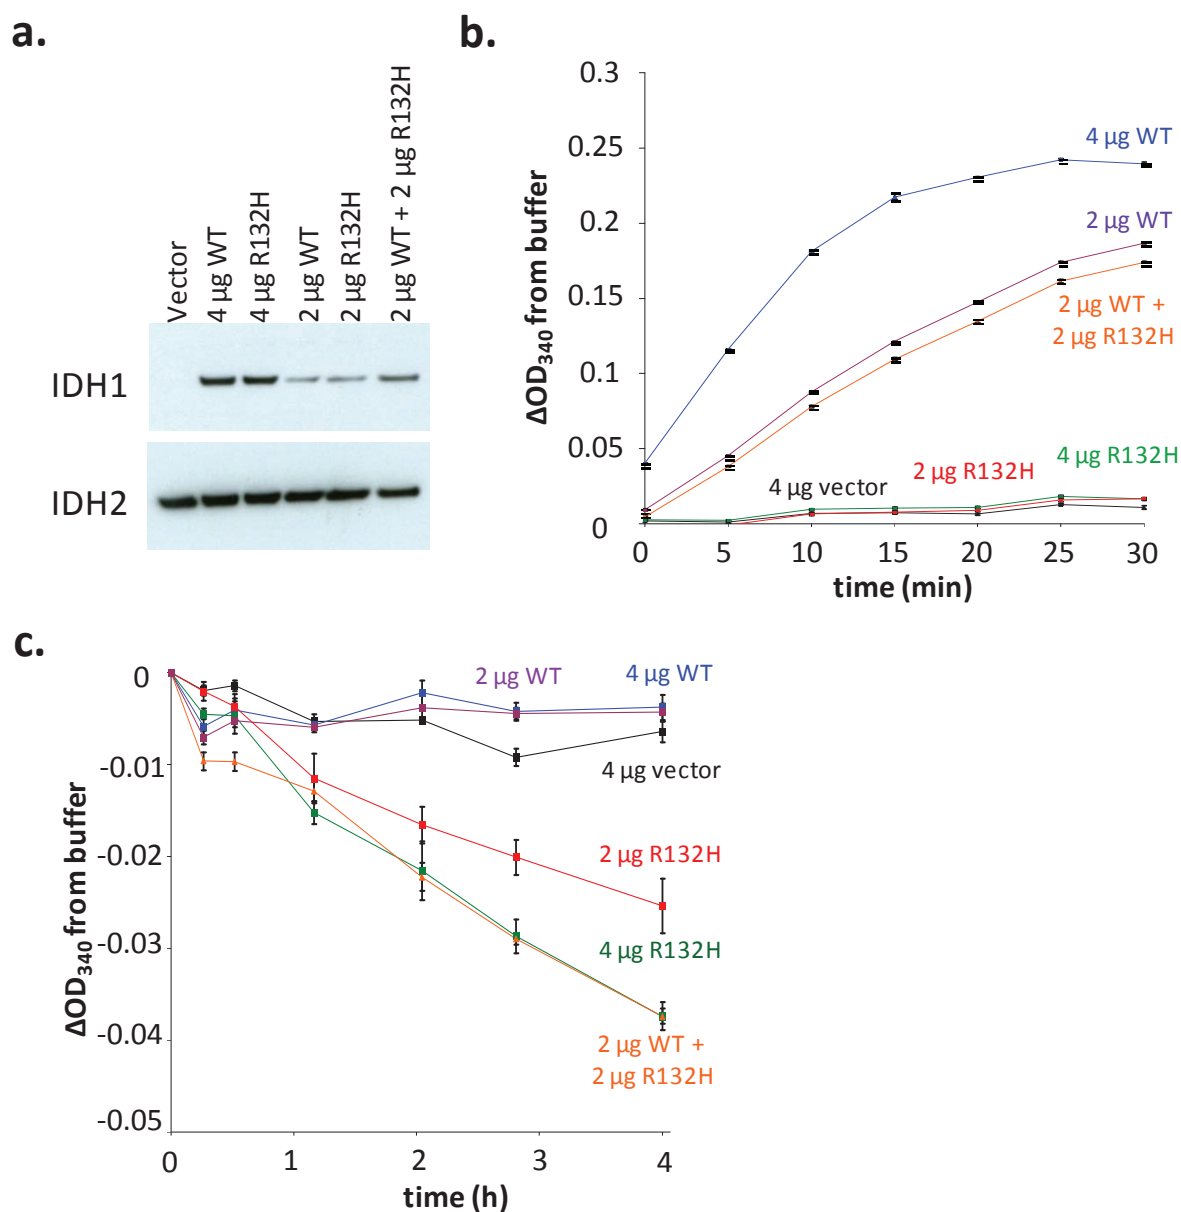

**Supplementary Figure 3. Expression of R132H mutant IDH1 results in  $\alpha\text{KG}$ -dependent NADPH consumption.**

**(a)** 293T cells were transfected with the indicated amount of wild-type (WT) or R132H mutant IDH1. The expression level of IDH1 was confirmed by Western blot as shown. Re-probing of the same blot with antibody against IDH2 is also shown as a control. **(b)** 293T protein lysates, from cells transfected with the listed amounts of wild-type or R132H mutant IDH1 cDNA, or empty VEC, were assayed for their ability to generate NADPH from  $\text{NADP}^+$  in the presence of 0.1 mM isocitrate. **(c)** The same cell lysates described in (b) were assessed for their ability to consume NADPH in the presence of 0.6 mM  $\alpha\text{KG}$ . The data in the figure are representative of 4 independent experiments. In both (b) and (c) error bars represent the standard error of the mean from 3 independent measurements at the time point indicated.

a.

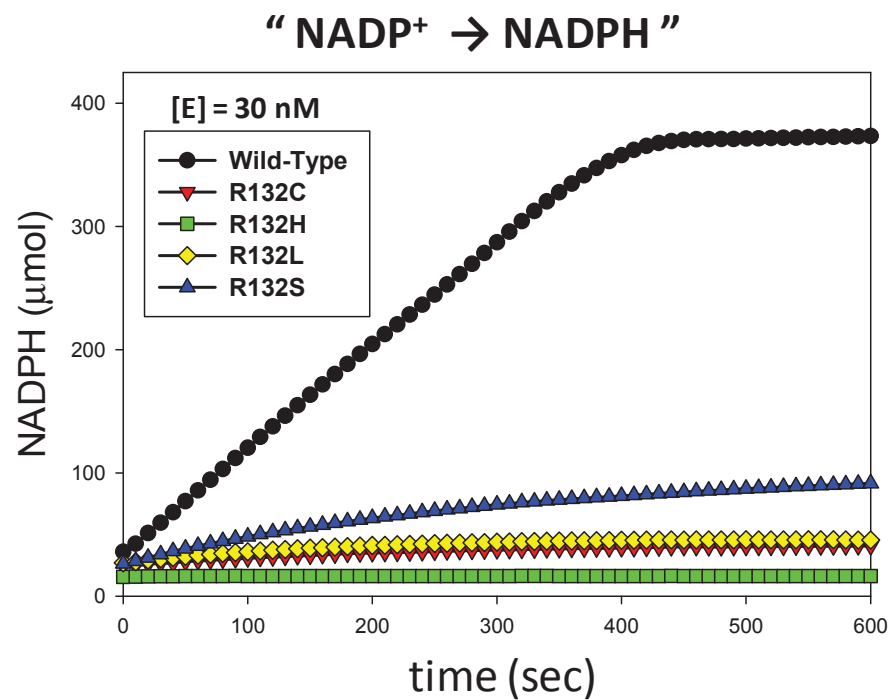

b.

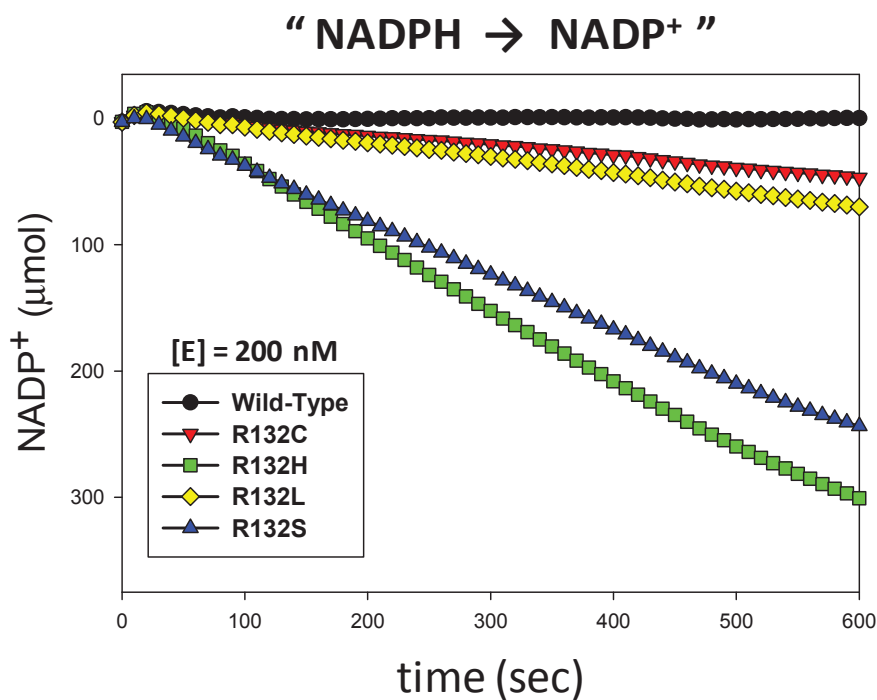

**Supplementary Figure 4. R132H mutation alters the enzymatic properties of IDH1.** (a) Recombinant human wild-type (WT) and various R132 mutant IDH1 enzymes were assessed for oxidative decarboxylation of isocitrate to  $\alpha$ KG with NADP<sup>+</sup> as cofactor. (b) WT and various R132 mutant IDH1 enzymes were assessed for reduction of  $\alpha$ KG with NADPH as cofactor. Different concentrations of enzyme were used to generate the curves presented in (a) and (b).

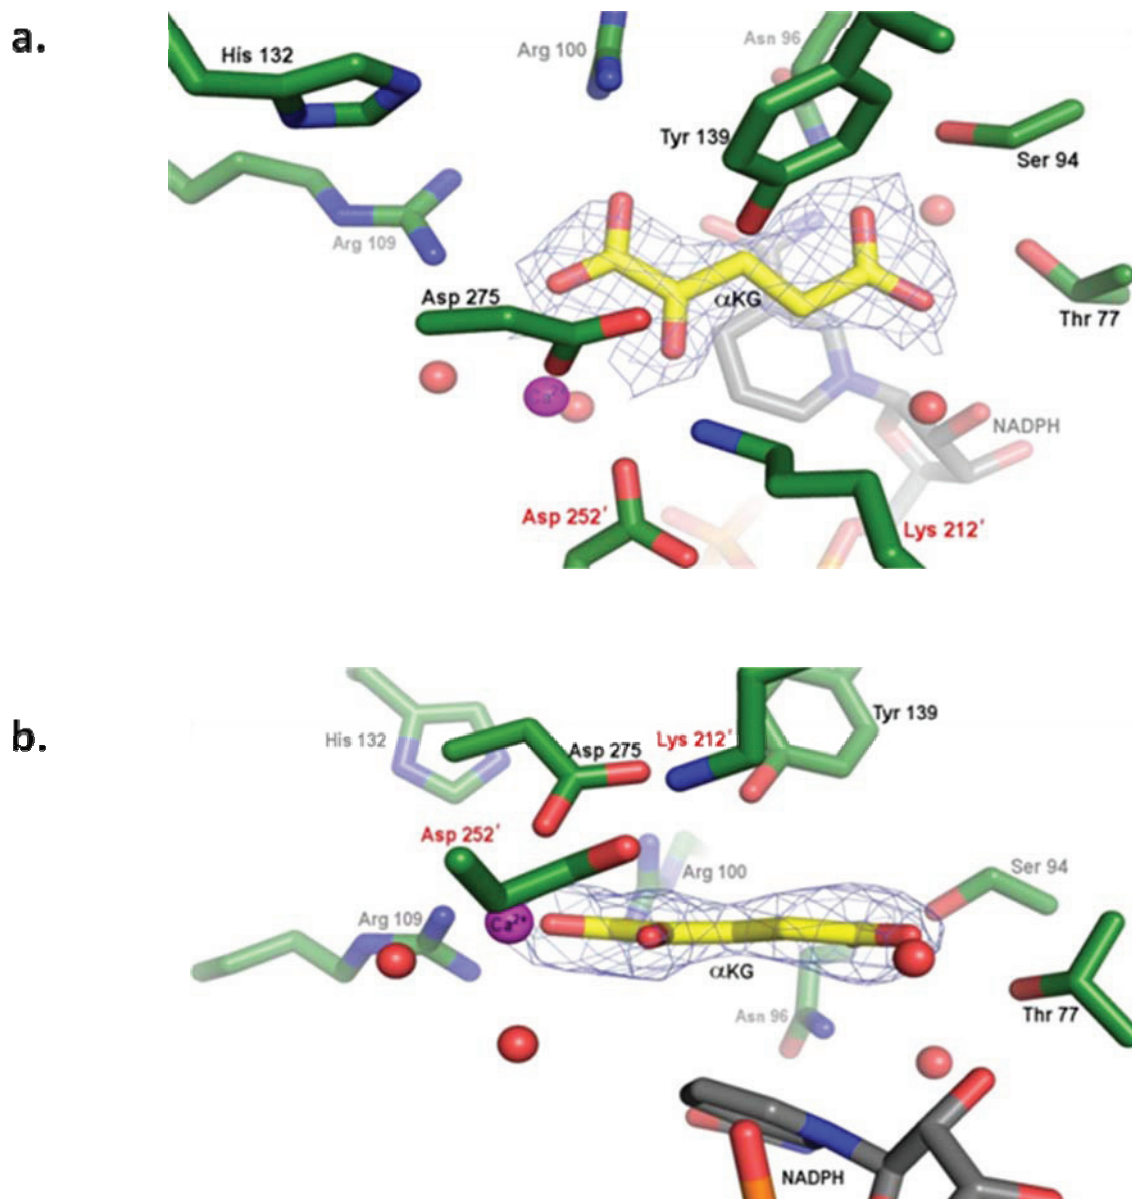

**Supplementary Figure 5. The OMIT map for the substrate-binding region.**  $\alpha$ KG substrate was omitted from the final model and 2Fo-Fc map was calculated using the last set of structure factors. The omitted ligand  $\alpha$ KG is displayed in the resultant electron density map contoured at  $1\sigma$  viewed face-on in (a) and edge-on in (b).

**Crystallography data and refinement statistics**

| IDH1 R132H                                          |                          |
|-----------------------------------------------------|--------------------------|
| <b>Data collection</b>                              |                          |
| Space group                                         | C 2 2 2 <sub>1</sub>     |
| Cell dimensions                                     |                          |
| <i>a</i> , <i>b</i> , <i>c</i> (Å)                  | 96.1, 274.7, 116.5       |
| $\alpha$ , $\beta$ , $\gamma$ (°)                   | 90, 90, 90               |
| Resolution (Å)                                      | 25 - 2.10 (2.18 - 2.10)* |
| <i>R</i> <sub>merge</sub>                           | 0.080 (0.305)            |
| <i>I</i> / $\sigma$ <sub><i>I</i></sub>             | 20.3 (2.4)               |
| Completeness (%)                                    | 92.4 (58.8)              |
| Redundancy                                          | 8.6 (2.1)                |
| <b>Refinement</b>                                   |                          |
| Resolution (Å)                                      | 25-2.10                  |
| No. reflections                                     | 83109                    |
| <i>R</i> <sub>work</sub> / <i>R</i> <sub>free</sub> | 0.220/0.262              |
| No. atoms                                           |                          |
| Protein                                             | 9706                     |
| Ligand/ion                                          | 198                      |
| Water                                               | 301                      |
| B-factors                                           |                          |
| Protein                                             | 33.2                     |
| Ligand/ion                                          | 30.9                     |
| Water                                               | 38.7                     |
| r.m.s deviations                                    |                          |
| Bond lengths (Å)                                    | 0.014                    |
| Bond angles (°)                                     | 1.1                      |

*Structure R132H IDH1 was refined using data from a single crystal.*

*\*Highest resolution shell is shown in parenthesis.*

**Supplementary Table 1: Crystallography data and refinement statistics.** X-ray diffraction data processing and refinement statistics. Values in parentheses are for the highest resolution bin of diffraction data.  $R_{\text{work}} = \frac{\sum_{\text{hkl}} |F_o - F_c|}{\sum_{\text{hkl}} F_o}$ , where  $F_o$  and  $F_c$  are the observed and calculated structure factor amplitudes, respectively, for all reflections hkl used in refinement.  $R_{\text{free}}$  is calculated for the 5% of the data that were not used in refinement.

## Characterization of human brain tumor samples.

| Sample ID | Primary Specimen Diagnosis       | WHO Grade | Tumor Cells in Tumor Foci (%) | Genotype  | Nucleotide change | Codon | 2HG (μmole/g) | αKG (μmole/g) | Malate (μmole/g) | Fumarate (μmole/g) | Succinate (μmole/g) | Isocitrate (μmole/g) |
|-----------|----------------------------------|-----------|-------------------------------|-----------|-------------------|-------|---------------|---------------|------------------|--------------------|---------------------|----------------------|
| 1         | Glioblastoma, residual/recurrent | IV        | n/a                           | wild type | wild type         | R132  | 0.18          | 0.161         | 1.182            | 0.923              | 1.075               | 0.041                |
| 2         | Glioblastoma                     | IV        | n/a                           | wild type | wild type         | R132  | 0.16          | 0.079         | 1.708            | 1.186              | 3.156               | 0.100                |
| 3         | Glioblastoma                     | IV        | n/a                           | wild type | wild type         | R132  | 0.13          | 0.028         | 0.140            | 0.170              | 0.891               | 0.017                |
| 4         | Oligoastrocytoma                 | II        | n/a                           | wild type | wild type         | R132  | 0.21          | 0.016         | 0.553            | 1.061              | 1.731               | 0.089                |
| 5         | Glioblastoma                     | IV        | n/a                           | mutant    | G364A             | R132H | 16.97         | 0.085         | 1.091            | 0.807              | 1.357               | 0.058                |
| 6         | Glioblastoma                     | IV        | n/a                           | mutant    | G364A             | R132H | 19.42         | 0.023         | 0.462            | 0.590              | 1.966               | 0.073                |
| 7         | Glioblastoma                     | IV        | n/a                           | mutant    | G364A             | R132H | 31.56         | 0.068         | 0.758            | 0.503              | 2.019               | 0.093                |
| 8         | Oligodendroglioma, anaplastic    | III       | 75                            | mutant    | G364A             | R132H | 12.49         | 0.033         | 0.556            | 0.439              | 0.507               | 0.091                |
| 9         | Oligodendroglioma, anaplastic    | III       | 90                            | mutant    | G364A             | R132H | 4.59          | 0.029         | 1.377            | 1.060              | 1.077               | 0.574                |
| 10        | Oligoastrocytoma                 | II        | n/a                           | mutant    | G364A             | R132H | 6.80          | 0.038         | 0.403            | 0.503              | 1.561               | 0.065                |
| 11        | Glioblastoma                     | IV        | n/a                           | wild type | wild type         | R132  | 0.686         | 0.011         | 0.113            | 0.990              | 5.085               | 0.007                |
| 12        | Glioblastoma                     | IV        | n/a                           | mutant    | G364A             | R132H | 18.791        | 0.016         | 0.470            | 0.462              | 2.673               | 0.031                |
| 13        | Glioblastoma                     | IV        | n/a                           | mutant    | G364A             | R132H | 4.59          | 0.029         | 1.377            | 1.060              | 1.077               | 0.043                |
| 14        | Glioblastoma                     | IV        | n/a                           | wild type | wild type         | R132  | 0.199         | 0.046         | 0.180            | 0.170              | 0.221               | 0.014                |
| 15        | Glioblastoma                     | IV        | n/a                           | mutant    | C363G             | R132G | 13.827        | 0.030         | 0.905            | 0.599              | 1.335               | 0.046                |
| 16        | Glioblastoma                     | IV        | n/a                           | mutant    | G364A             | R132H | 28.364        | 0.068         | 0.535            | 0.488              | 2.105               | 0.054                |
| 17        | Glioblastoma                     | IV        | n/a                           | mutant    | C363A             | R132S | 9.364         | 0.029         | 1.038            | 0.693              | 2.151               | 0.121                |
| 18        | Glioblastoma                     | IV        | n/a                           | wild type | wild type         | R132  | 0.540         | 0.031         | 0.468            | 0.608              | 1.490               | 0.102                |
| 19        | Glioma, malignant, astrocytoma   | IV        | 80                            | mutant    | G364A             | R132H | 19.000        | 0.050         | 0.654            | 0.391              | 2.197               | 0.171                |
| 20        | Oligodendroglioma                | III       | 80                            | wild type | wild type         | R132  | 0.045         | 0.037         | 1.576            | 0.998              | 1.420               | 0.018                |
| 21        | Glioma, malignant, astrocytoma   | IV        | 95                            | wild type | wild type         | R132  | 0.064         | 0.034         | 0.711            | 0.710              | 2.105               | 0.165                |
| 22        | Glioblastoma                     | IV        | 70                            | wild type | wild type         | R132  | 0.171         | 0.041         | 2.066            | 1.323              | 0.027               | 0.072                |

**Supplementary Table 2: Characterization of human brain tumor samples.** The clinical characteristics, IDH1 mutation status, as well as the levels of metabolites measurement in the clinical specimens used for this study, are listed. Clinical information for tumors where data was not available is labeled “n/a”.
